# Supplementary material
Source: PubMed Central journal article supplement (PMC7887114)

# Supplementary Figure 1

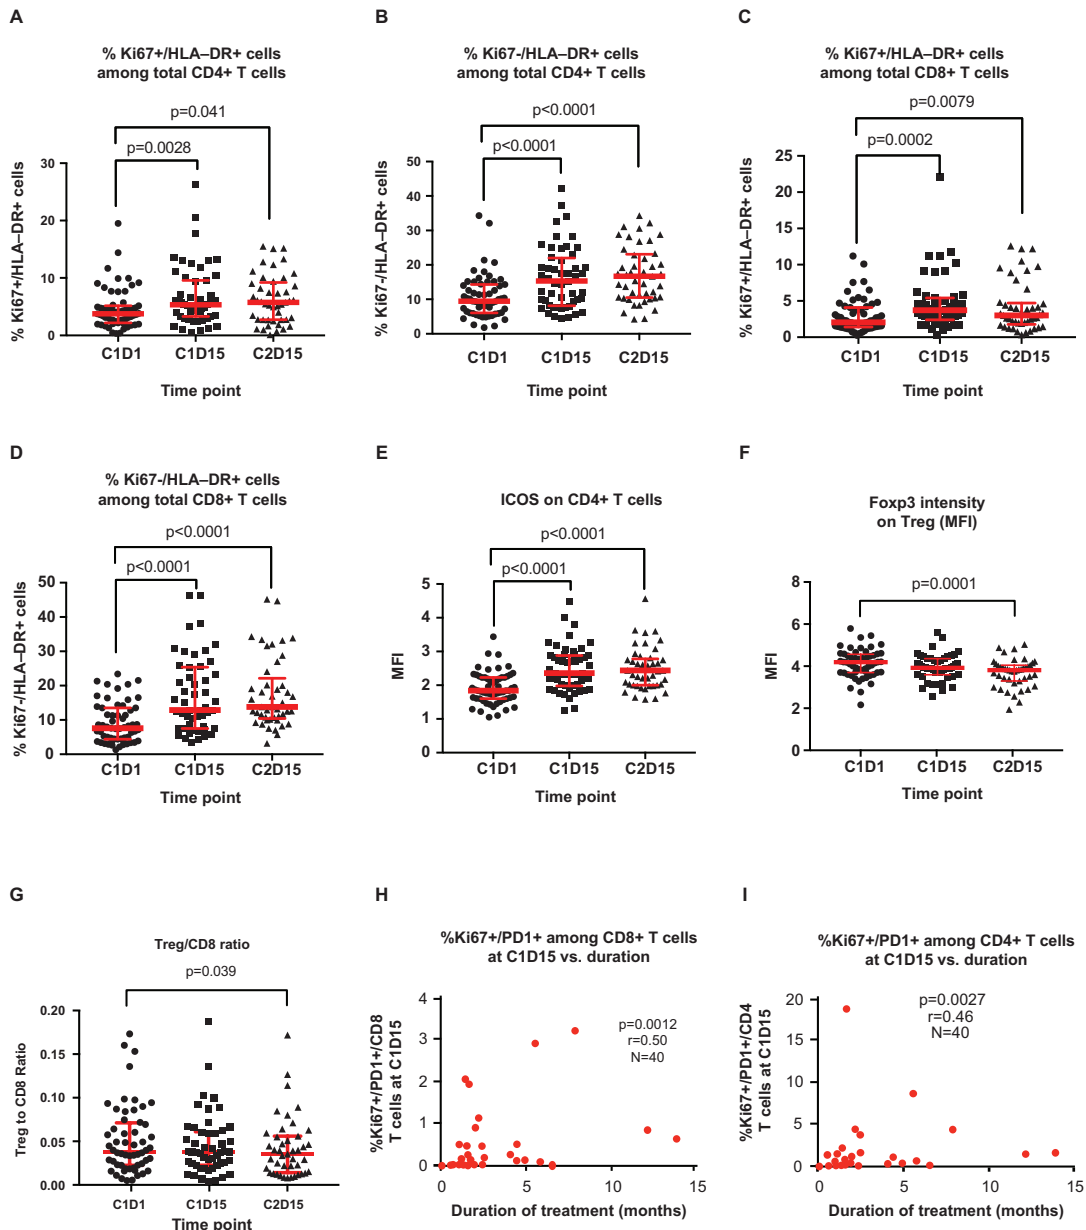

Supplement: NIHMS1656805-supplement-Supplementary_Figure_1.pdf [file NIHMS1656805-supplement-Supplementary_Figure_1.pdf]

Supplementary Figure 2

A

**m-MDSC**

$p = 0.504$

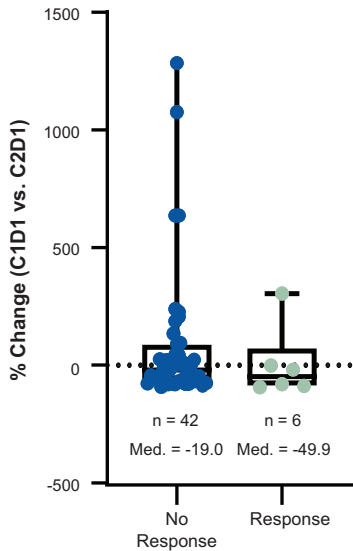

B

**PMN-MDSC**

$p = 0.312$

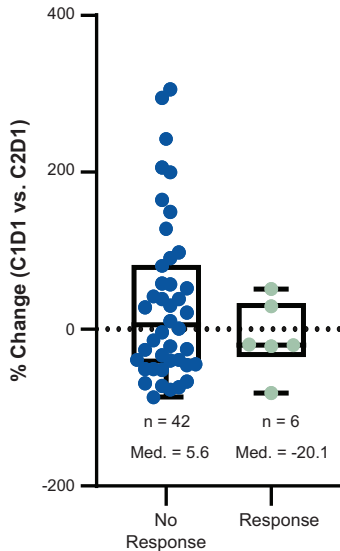

C

**e-MDSC**

$p = 0.378$

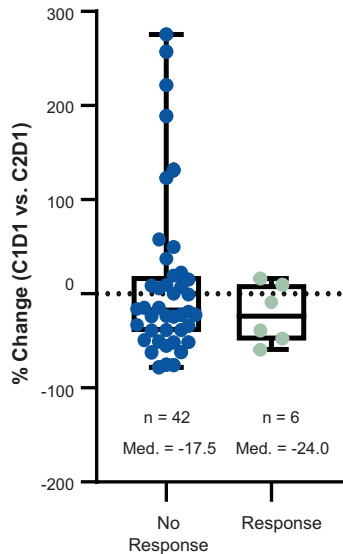

Supplement: NIHMS1656805-supplement-Supplementary_Figure_2.pdf [file NIHMS1656805-supplement-Supplementary_Figure_2.pdf]
